# Supplementary material for: A novel model of reno-cardiac syndrome in the C57BL/ 6 mouse strain
Source: Springer Nature journal article supplement (doi:10.1186/s12882-018-1155-3), 2018-12-01
Supplement: MOESM1 [file 16314110]

## Rat and Mouse No.1 Maintenance

*Pelleted, Expanded and Expanded Ground*

### SUITABLE SPECIES AND APPLICATIONS

Rats and mice for long and short term maintenance.

### BENEFITS

- High quality human food grade soya bean concentrate provides a less variable source of protein.
- Low protein level promotes longer life expectancy, reducing obesity and associated problems in the aged animal.
- Low nutrient levels reduce the risk of undesirable side-effects in toxicity trials being masked.

### FEEDING GUIDE

Ad-lib feeding is recommended.

### AVAILABLE AS

| Diet            | Form            | Product Code |
|-----------------|-----------------|--------------|
| <i>Standard</i> |                 |              |
| RM1 (P)         | 9.5mm Pelleted  | 801151       |
| RM1 (E)         | Expanded        | 801002       |
| <i>SQC</i>      |                 |              |
| RM1 (E) SQC     | Expanded        | 811002       |
| RM1 (E) FG SQC  | Expanded Ground | 811004       |

- All diets are available irradiated and are available in a range of packaging.
- All Standard diets are available with full analysis on request.

### INGREDIENTS

Wheat, Barley, Wheatfeed, De-hulled Extracted Toasted Soya, Soya Protein Concentrate, Macro Minerals, Soya Oil, Whey Powder, Amino Acids, Vitamins, Micro Minerals.

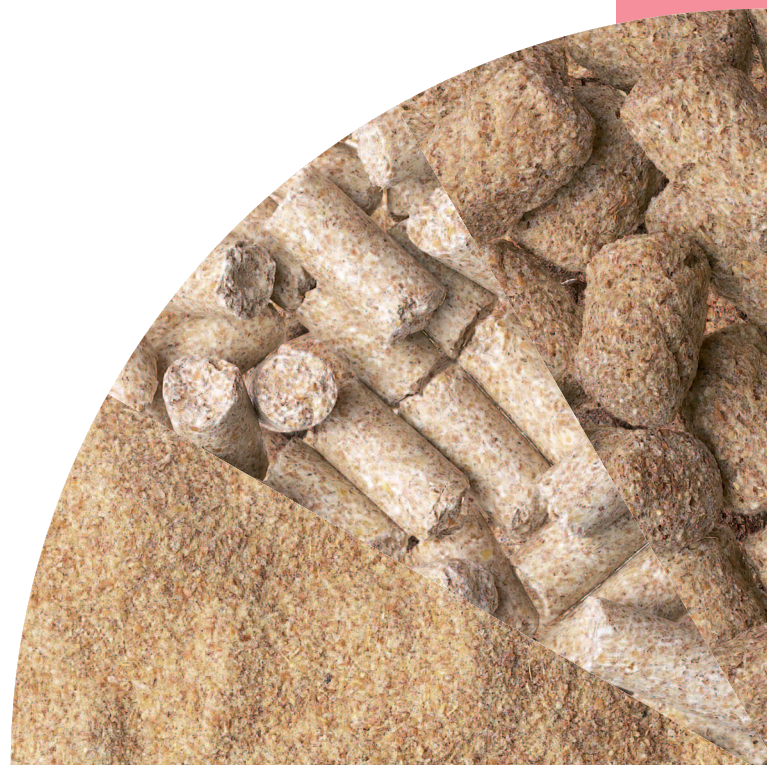

## Calculated Analysis

| NUTRIENTS                                                        |       | Total | Supp (9) |
|------------------------------------------------------------------|-------|-------|----------|
| <b>Proximate Analysis</b>                                        |       |       |          |
| Moisture (1)                                                     | %     | 10.00 |          |
| Crude Oil                                                        | %     | 2.71  |          |
| Crude Protein                                                    | %     | 14.38 |          |
| Crude Fibre                                                      | %     | 4.65  |          |
| Ash                                                              | %     | 6.00  |          |
| Nitrogen Free Extract                                            | %     | 61.73 |          |
| <b>Digestibility Co-Efficients (7)</b>                           |       |       |          |
| Digestible Crude Oil                                             | %     | 2.47  |          |
| Digestible Crude Protein                                         | %     | 12.92 |          |
| <b>Carbohydrates, Fibre and Non Starch Polysaccharides (NSP)</b> |       |       |          |
| Total Dietary Fibre                                              | %     | 17.05 |          |
| Pectin                                                           | %     | 1.52  |          |
| Hemicellulose                                                    | %     | 10.17 |          |
| Cellulose                                                        | %     | 4.32  |          |
| Lignin                                                           | %     | 1.68  |          |
| Starch                                                           | %     | 44.97 |          |
| Sugar                                                            | %     | 4.05  |          |
| <b>Energy (5)</b>                                                |       |       |          |
| Gross Energy                                                     | MJ/kg | 14.74 |          |
| Digestible Energy (15)                                           | MJ/kg | 11.90 |          |
| Metabolisable Energy (15)                                        | MJ/kg | 10.74 |          |
| Atwater Fuel Energy (AFE)(8)                                     | MJ/kg | 13.75 |          |
| AFE from Oil                                                     | %     | 7.42  |          |
| AFE from Protein                                                 | %     | 17.49 |          |
| AFE from Carbohydrate                                            | %     | 75.09 |          |
| <b>Fatty Acids</b>                                               |       |       |          |
| <b>Saturated Fatty Acids</b>                                     |       |       |          |
| C12:0 Lauric                                                     | %     | 0.02  |          |
| C14:0 Myristic                                                   | %     | 0.14  |          |
| C16:0 Palmitic                                                   | %     | 0.31  |          |
| C18:0 Stearic                                                    | %     | 0.04  |          |
| <b>Monounsaturated Fatty Acids</b>                               |       |       |          |
| C14:1 Myristoleic                                                | %     | 0.02  |          |
| C16:1 Palmitoleic                                                | %     | 0.09  |          |
| C18:1 Oleic                                                      | %     | 0.77  |          |
| <b>Polyunsaturated Fatty Acids</b>                               |       |       |          |
| C18:2(ω6) Linoleic                                               | %     | 0.69  |          |
| C18:3(ω3) Linolenic                                              | %     | 0.06  |          |
| C20:4(ω6) Arachidonic                                            | %     | 0.13  |          |
| C22:5(ω3) Clupanodonic                                           | %     |       |          |
| <b>Amino Acids</b>                                               |       |       |          |
| Arginine                                                         | %     | 0.91  |          |
| Lysine (6)                                                       | %     | 0.66  | 0.07     |
| Methionine                                                       | %     | 0.22  | 0.04     |
| Cystine                                                          | %     | 0.24  |          |
| Tryptophan                                                       | %     | 0.18  |          |
| Histidine                                                        | %     | 0.35  |          |
| Threonine                                                        | %     | 0.49  |          |
| Isoleucine                                                       | %     | 0.54  |          |
| Leucine                                                          | %     | 0.98  |          |
| Phenylalanine                                                    | %     | 0.66  |          |
| Valine                                                           | %     | 0.69  |          |
| Tyrosine                                                         | %     | 0.49  |          |
| Taurine                                                          | %     |       |          |
| Glycine                                                          | %     | 1.11  |          |
| Aspartic Acid                                                    | %     | 0.67  |          |

| NUTRIENTS                                    |       | Total   | Supp (9) |
|----------------------------------------------|-------|---------|----------|
| Glutamic Acid                                | %     | 3.17    |          |
| Proline                                      | %     | 1.20    |          |
| Serine                                       | %     | 0.56    |          |
| Hydroxyproline                               | %     |         |          |
| Hydroxylysine                                | %     |         |          |
| Alanine                                      | %     | 0.16    |          |
| <b>Macro Minerals</b>                        |       |         |          |
| Calcium                                      | %     | 0.73    | 0.63     |
| Total Phosphorus                             | %     | 0.52    | 0.04     |
| Phytate Phosphorus                           | %     | 0.24    |          |
| Available Phosphorus                         | %     | 0.28    | 0.04     |
| Sodium                                       | %     | 0.25    | 0.19     |
| Chloride                                     | %     | 0.38    | 0.32     |
| Potassium                                    | %     | 0.67    |          |
| Magnesium                                    | %     | 0.23    |          |
| <b>Micro Minerals</b>                        |       |         |          |
| Iron                                         | mg/kg | 159.30  | 82.50    |
| Copper                                       | mg/kg | 11.50   | 1.94     |
| Manganese                                    | mg/kg | 72.44   | 19.22    |
| Zinc                                         | mg/kg | 35.75   |          |
| Cobalt                                       | µg/kg | 634.10  | 550.00   |
| Iodine                                       | µg/kg | 1202.69 | 1085.00  |
| Selenium                                     | µg/kg | 298.99  | 100.00   |
| Fluorine                                     | mg/kg | 10.49   |          |
| <b>Vitamins</b>                              |       |         |          |
| β-Carotene (2)                               | mg/kg | 0.16    |          |
| Retinol (2)                                  | µg/kg | 2566.38 | 2400.00  |
| Vitamin A (2)                                | iu/kg | 8554.27 | 8000.00  |
| Cholecalciferol (3)                          | µg/kg | 15.54   | 15.00    |
| Vitamin D (3)                                | iu/kg | 621.70  | 600.00   |
| α-Tocopherol (4)                             | mg/kg | 76.45   | 56.82    |
| Vitamin E (4)                                | iu/kg | 84.10   | 62.50    |
| Vitamin B <sub>1</sub> (Thiamine)            | mg/kg | 8.58    | 1.96     |
| Vitamin B <sub>2</sub> (Riboflavin)          | mg/kg | 4.33    | 2.94     |
| Vitamin B <sub>6</sub> (Pyridoxine)          | mg/kg | 4.81    | 0.98     |
| Vitamin B <sub>12</sub> (Cyanocobalamin)     | µg/kg | 7.49    | 6.00     |
| Vitamin C (Ascorbic Acid)                    | mg/kg | 2.59    |          |
| Vitamin K (Menadione)                        | mg/kg | 10.17   | 9.36     |
| Folic Acid (Vitamin B <sub>9</sub> )         | mg/kg | 0.79    |          |
| Nicotinic Acid (Vitamin PP) (6)              | mg/kg | 61.32   | 2.45     |
| Pantothenic Acid (Vitamin B <sub>3/5</sub> ) | mg/kg | 20.17   | 5.80     |
| Choline (Vitamin B <sub>4/7</sub> )          | mg/kg | 1080.14 | 366.60   |
| Inositol                                     | mg/kg | 2369.59 |          |
| Biotin (Vitamin H) (6)                       | µg/kg | 277.13  |          |

### Notes

- All values are calculated using a moisture basis of 10%.  
Typical moisture levels will range between 9.5 - 11.5%.
- a. Vitamin A includes Retinol and the Retinol equivalents of β-carotene  
b. Retinol includes the Retinol equivalents of β-Carotene.  
c. 0.48 µg Retinol = 1 µg β-carotene = 1.6 iu Vitamin A activity  
d. 1 µg Retinol = 3.33\* iu Vitamin A activity  
e. 1 iu Vitamin A = 0.3 µg Retinol = 0.6 µg β-carotene  
f. The standard analysis for Vitamin A does not detect β-carotene
- 1 µg Cholecalciferol (D<sub>3</sub>) = 40.0 iu Vitamin D
- 1 mg all-*rac*-α-tocopherol = 1.1 iu Vitamin E activity  
1 mg all-*rac*-α-tocopherol acetate = 1.0 iu Vitamin E activity
- 1 MJ = 239.23 Kcalories = 239.23 Calories = 239,230 calories
- These nutrients coming from natural raw materials such as cereals may have low availabilities due to the interactions with other compounds.
- Based on in-vitro digestibility analysis.
- AF Energy = Atwater Fuel Energy = ((CO%/100)\*9000)+  
((CP%/100)\*4000)+((NFE%/100)\*4000)/239.23
- Supplemented nutrients from manufactured and mined sources.
- Calculated.
