# Supplementary material for: A novel model of reno-cardiac syndrome in the C57BL/ 6 mouse strain
Source: Springer Nature journal article supplement (doi:10.1186/s12882-018-1155-3), 2018-12-01
Supplement: MOESM3 [file 16314110]

| <b>Parameter</b>             | <b>Method of measurement</b>               |
|------------------------------|--------------------------------------------|
| <b>Creatinine</b>            | Jaffe alkaline picrate                     |
| <b>Urea</b>                  | Enzymatic UV test                          |
| <b>Sodium</b>                | Indirect potentiometry                     |
| <b>Potassium</b>             | Indirect potentiometry                     |
| <b>Calcium</b>               | Cresolphthalein complex                    |
| <b>Inorganic phosphorous</b> | Ammonium-Phosphomolybdate-complex, UV-Test |
