# Supplementary material for: A novel model of reno-cardiac syndrome in the C57BL/ 6 mouse strain
Source: Springer Nature journal article supplement (doi:10.1186/s12882-018-1155-3), 2018-12-01

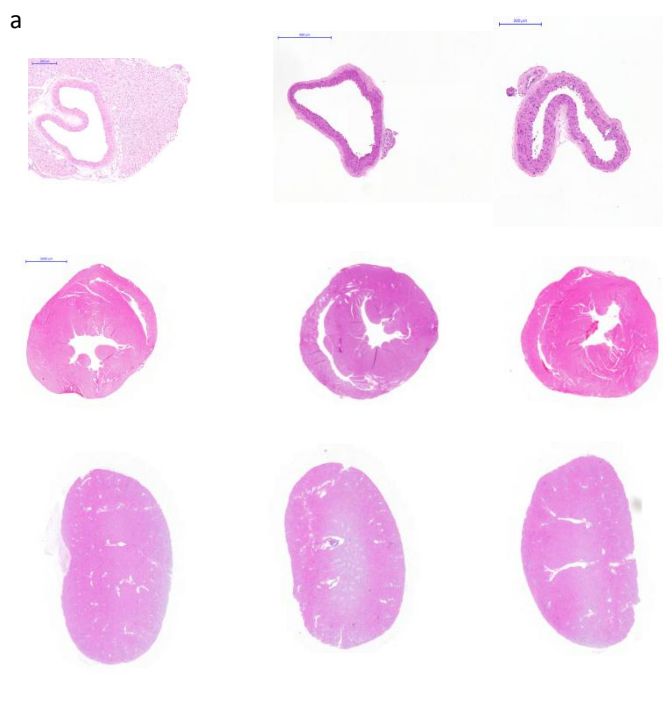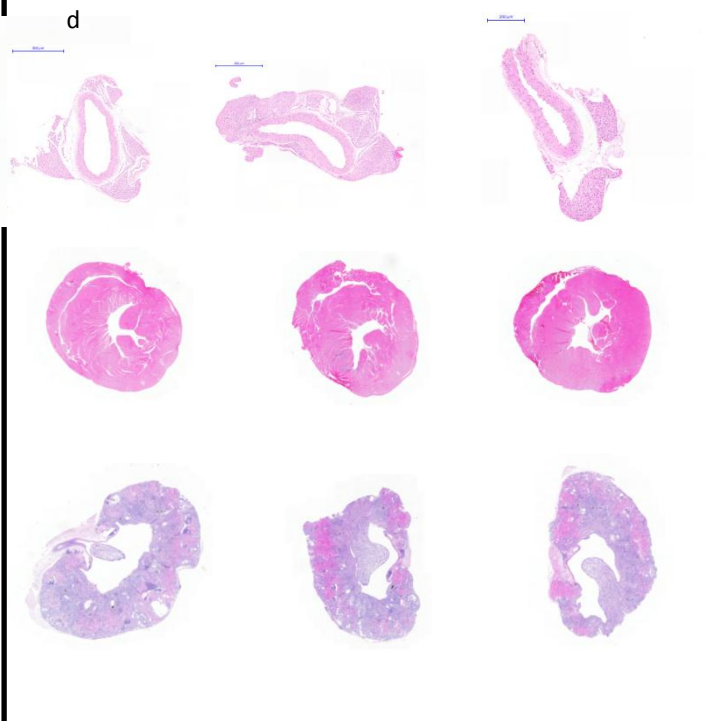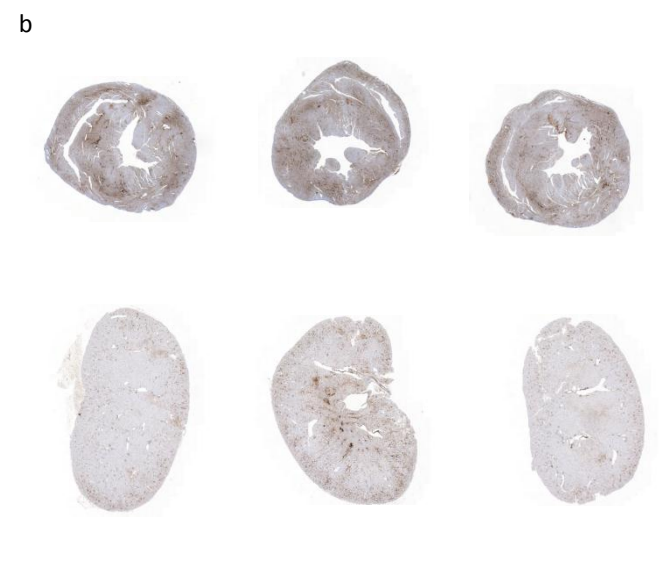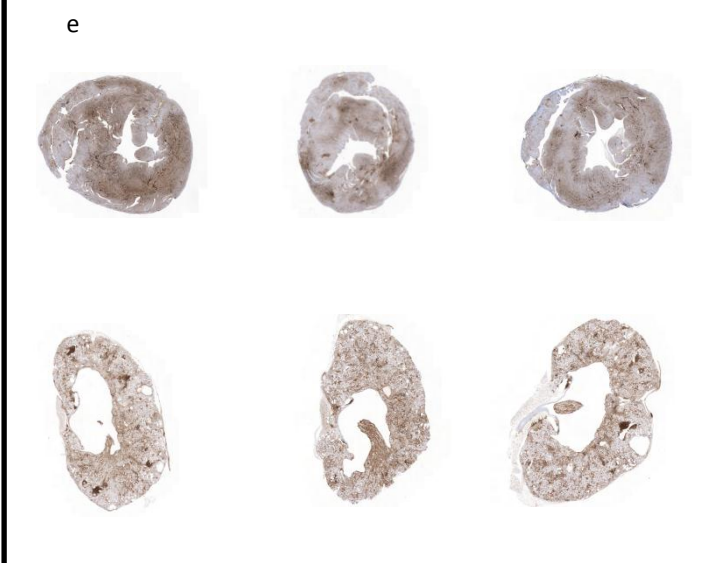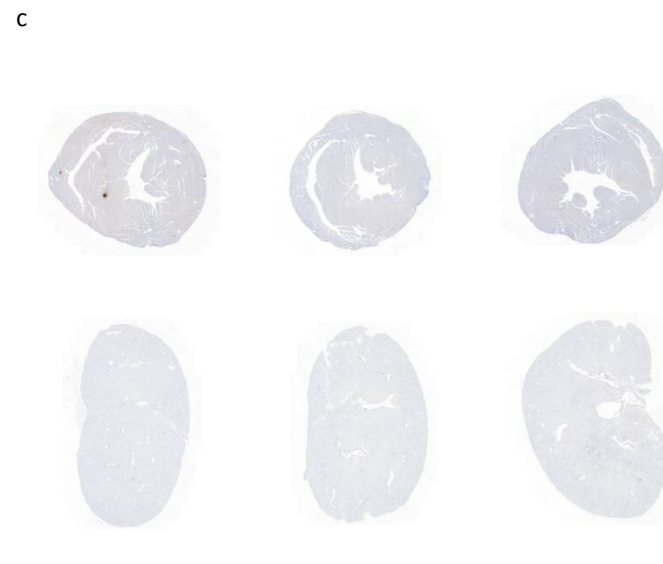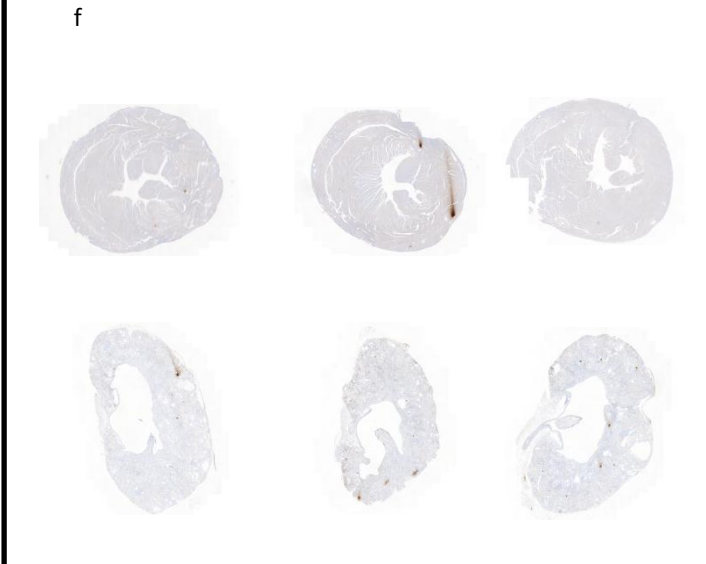

Supplement: MOESM6 [file 16314110]
